# Supplementary material
Source: bioRxiv or medRxiv preprint supplement (https://www.biorxiv.org/highwire/filestream/28069/field_highwire_adjunct_files/5/099168-6.pdf)
Supplement: Supplementary file [file 099168-6.pdf]

**Supplementary Table 1**

*Diaphorina citri* gene set identified in the Arthropods dataset using BUSCO. The BUSCO Arthropoda mark

| <b>BUSCO groups/Data</b> | <b>Sequences per</b> | <b>Complete</b> | <b>Fragmented</b> | <b>Missing</b> |
|--------------------------|----------------------|-----------------|-------------------|----------------|
| <b>NCBI v100</b>         | <b>20,996</b>        | 84.90%          | 9.80%             | 5.30%          |
| <b>MCOT v1.0</b>         | <b>30,562</b>        | 97.50%          | 0.40%             | 2.10%          |
| <b>MCOT v1.0 Mapped</b>  | <b>19,744</b>        | 63.80%          | 10.10%            | 26.10%         |
| <b>Egg</b>               | <b>76,467</b>        | 90.70%          | 6.80%             | 2.50%          |
| <b>Nymph</b>             | <b>69,175</b>        | 85.80%          | 10.90%            | 3.30%          |
| <b>Adult</b>             | <b>62,412</b>        | 82.10%          | 13.10%            | 4.80%          |
| <b>Maker</b>             | <b>18,242</b>        | 77.60%          | 13.70%            | 8.70%          |
| <b>Genome</b>            | <b>161,988</b>       | 90.00%          | 6.00%             | 4.00%          |

er set includes 113 species and 1066 genes
